# Supplementary material for: Assessing the tolerance to room temperature and viability of freeze-dried mice spermatozoa over long-term storage at room temperature under vacuum
Source: PubMed Central journal article supplement (PMC6045625; doi:10.1038/s41598-018-28896-8), 2018-07-13
Supplement: 41598_2018_28896_MOESM1_ESM.pdf [file 41598_2018_28896_MOESM1_ESM.pdf]

**Assessing the tolerance to room temperature and viability  
of freeze-dried mice spermatozoa over long-term storage  
at room temperature under vacuum**

Yuko Kamada, Sayaka Wakayama, Ikue Shibasaki, Daiyu Ito,  
Satoshi Kamimura, Masatoshi Ooga and Teruhiko Wakayama

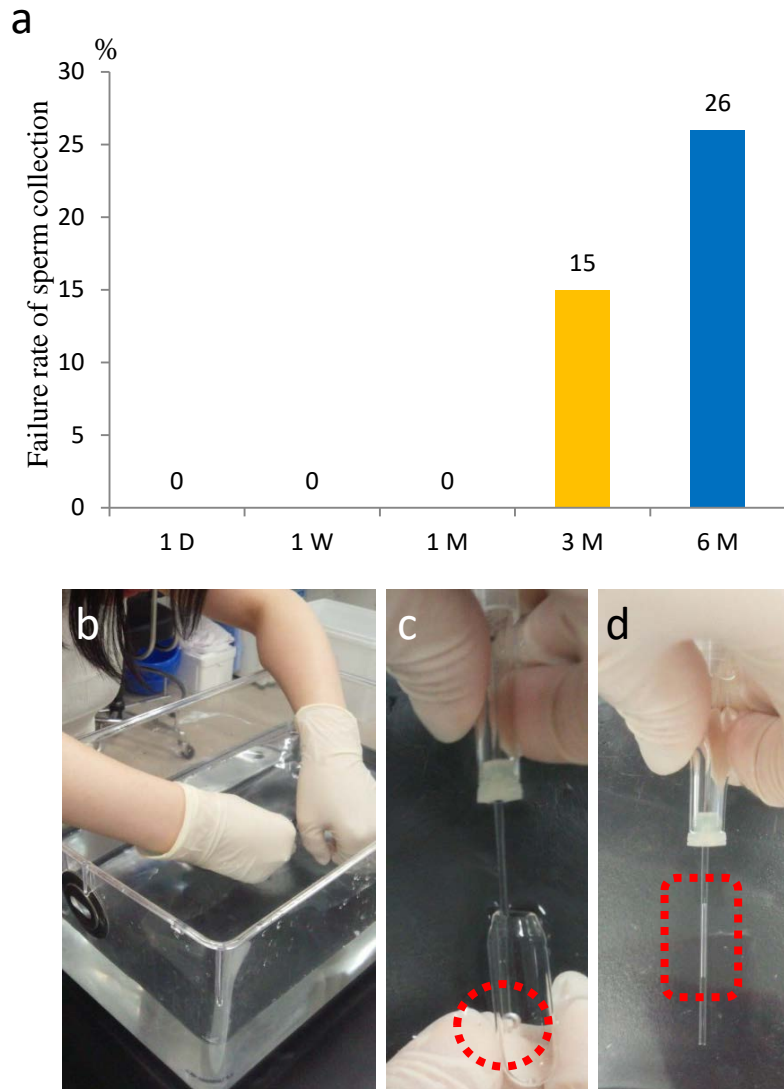

Supplemental Figure 1. Recovery rate of FD spermatozoa after rehydration of ampoules and method used to measure the amount of air trapped in ampoules. (a) The number of FD spermatozoa recovered after rehydration of ampoules stored at RT for up to 6 months. The air trapped in ampoules was measured by breaking the glass ampoules under water (b) and capturing the small air bubble (c) using a glass capillary (d).

## Vacuumed

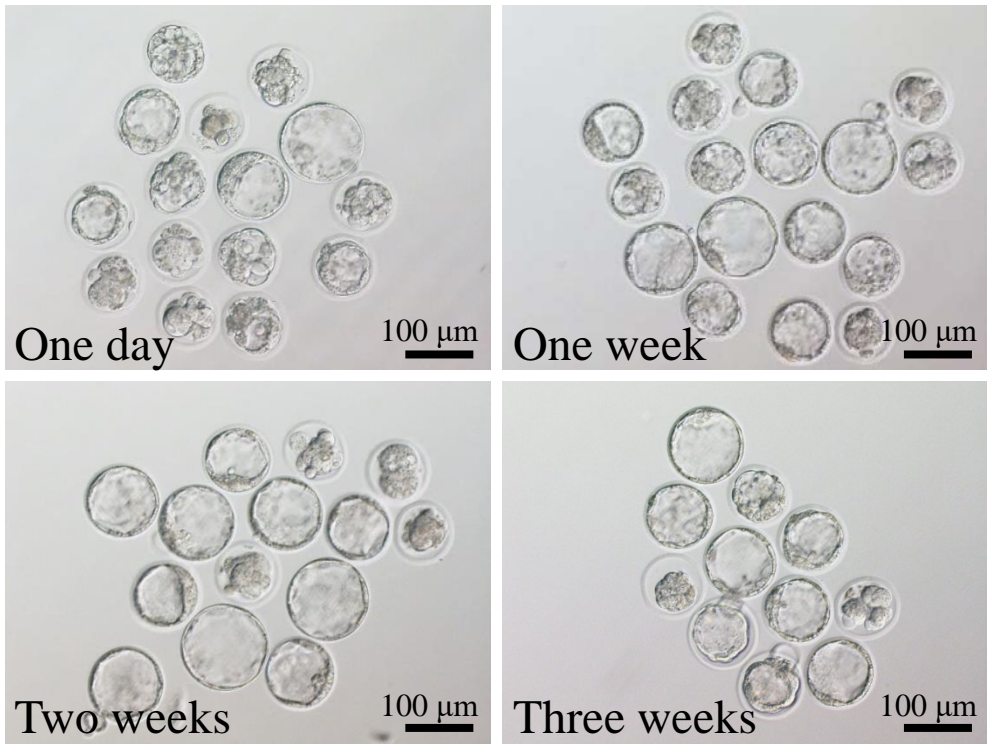

## Non-vacuumed

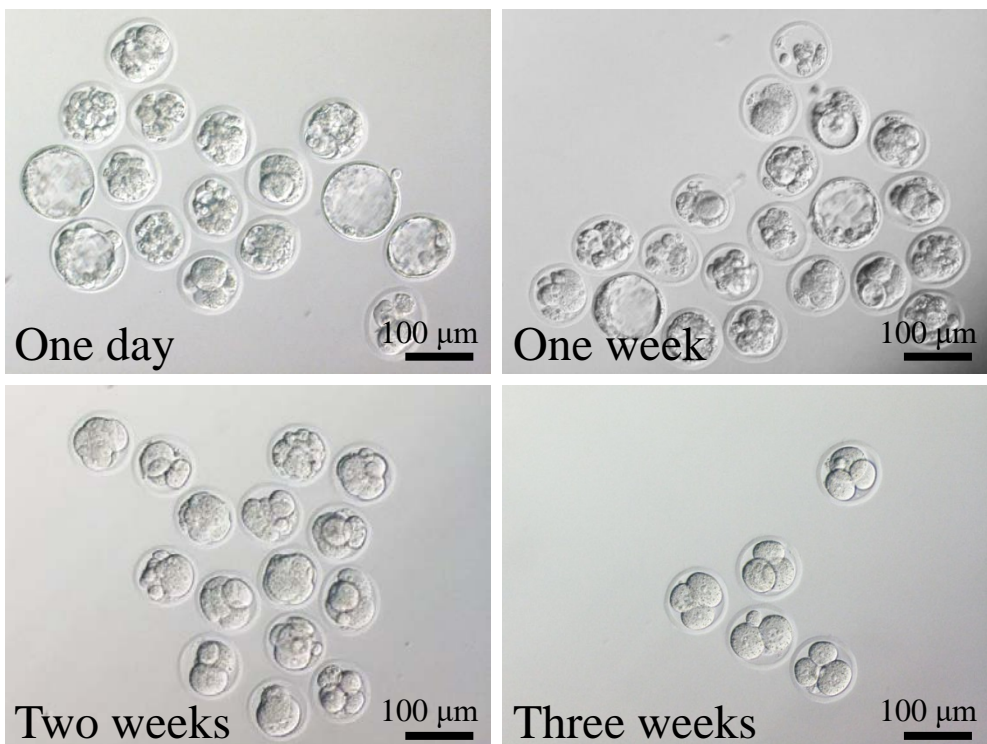

Supplemental Figure 2. Development of embryos derived from FD spermatozoa stored in vacuumed or nonvacuumed ampoules for up to 3 weeks at RT. All images show embryos cultured for 4 days *in vitro*.

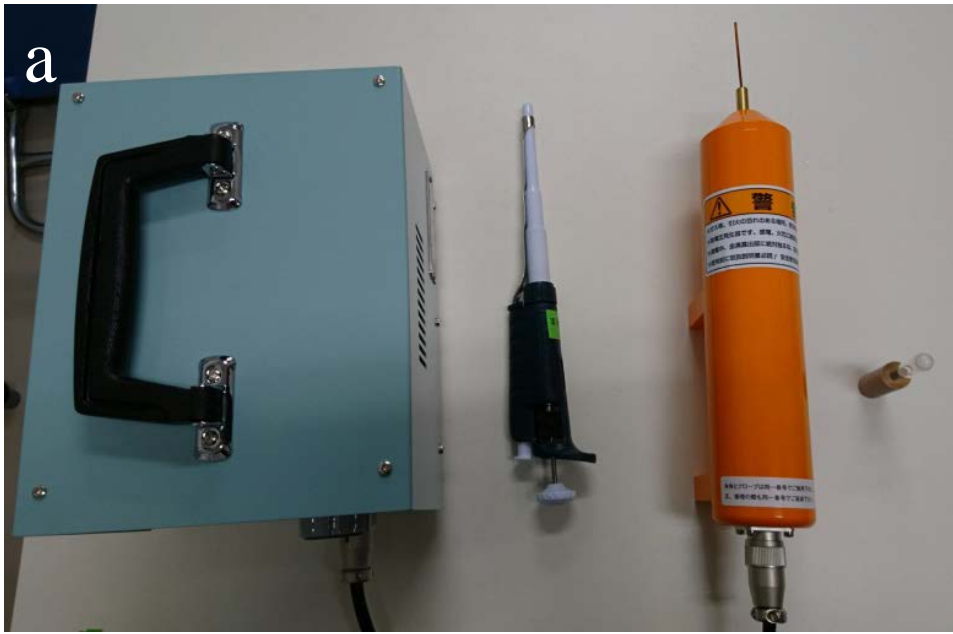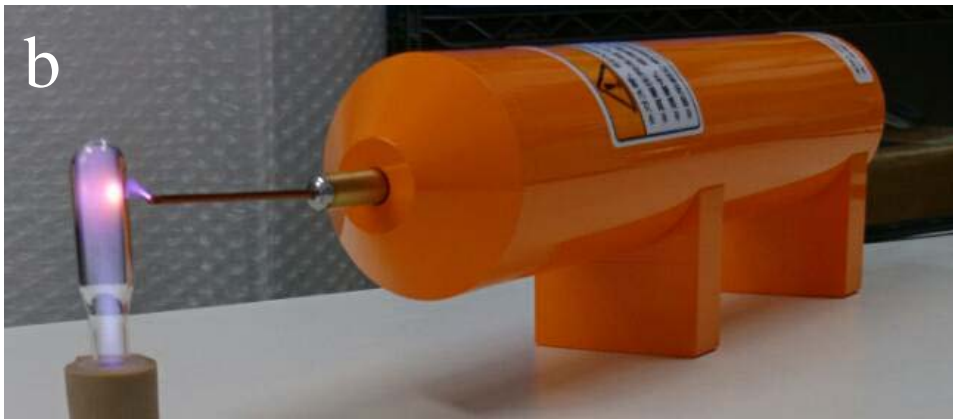

Supplemental Figure 3. Tesla coil leak detector. This is relatively small machine (a) and easy to handle it (b).

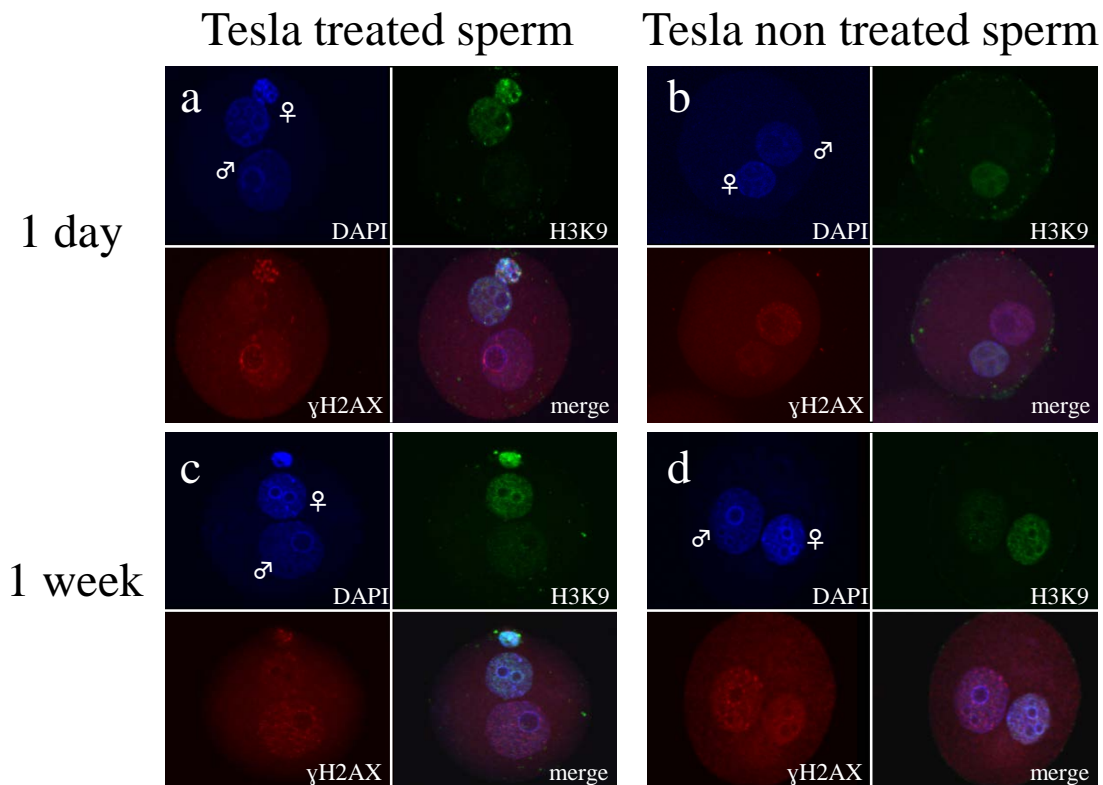

Supplemental Figure 4. Immunostaining of zygotes with anti-gamma-H2AX antibody. Zygotes were derived from FD spermatozoa stored in Tesla-treated or -untreated ampoules at RT for 1 day (a and b) or 1 week (c and d). Images show male and female pronuclei stained with DAPI in blue (upper left), female pronuclei labelled with anti-H3K9 me2 antibody in green (upper right), anti-gamma-H2AX signals indicating double-stranded DNA breaks in red (lower left) and merged images (lower right). The brightness of these pictures (a–d) was 1.44, 1.34, 1.73 and 1.49, respectively.

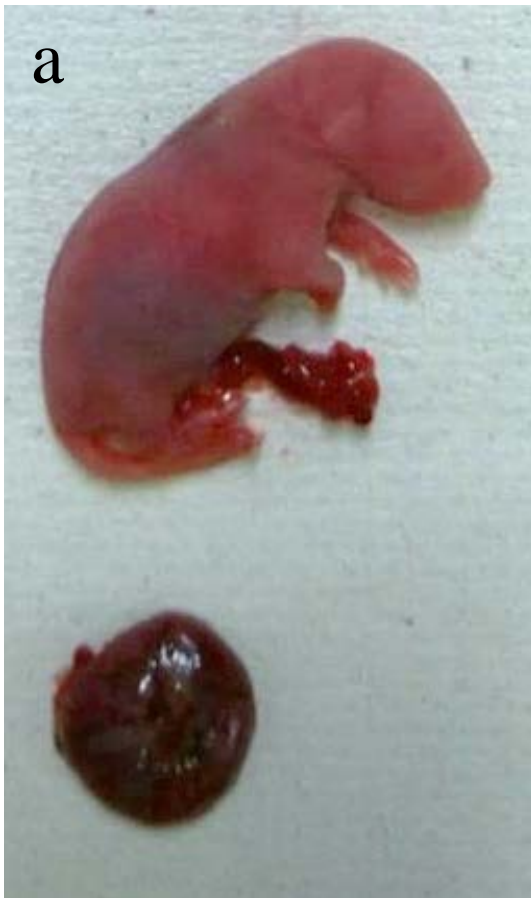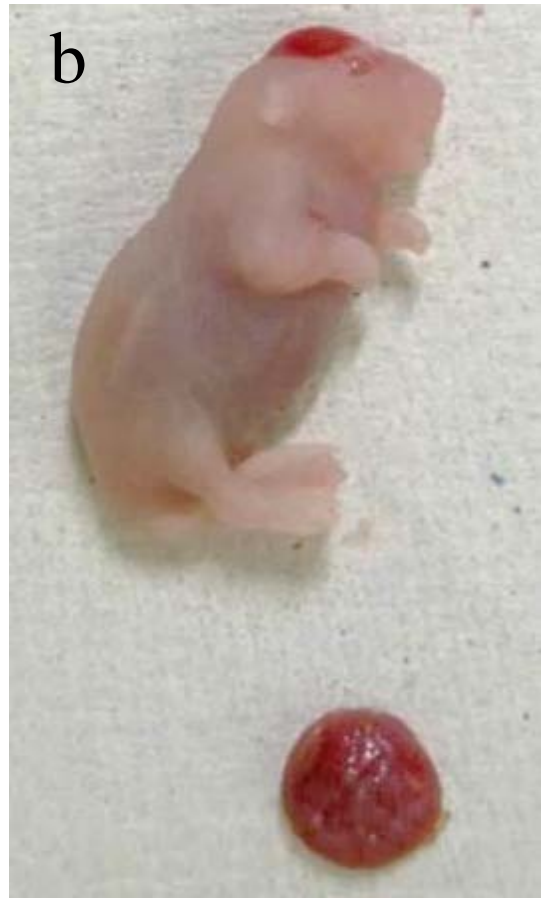

Supplemental Figure 5. Deformed offspring derived from FD spermatozoa preserved at RT. (a) Pup showing intestinal hernia, derived from 3-month-old spermatozoa. (b) Pup without a skull, derived from 1-year-old spermatozoa.

1 Table S1. Comparison of ampoules between same individual for full-term development after  
 2 ICSI

| Male ID | Ampoule No | No. of oocytes surviving after ICSI | No. (%) of fertilised zygotes | No. (%) of two-cell embryos at 24 h | No. of transferred embryos (no. of recipients) | No. (%) of offspring |
|---------|------------|-------------------------------------|-------------------------------|-------------------------------------|------------------------------------------------|----------------------|
| A       | 1          | 25                                  | 25 (100)                      | 23 (92.0)                           | 23 (1)                                         | 0 (0)                |
|         | 2          | 20                                  | 20 (100)                      | 20 (100)                            | 20 (1)                                         | 5 (25.0)             |
|         | 3          | 18                                  | 16 (88.9)                     | 14 (87.5)                           | 14 (1)                                         | 4 (28.5)             |
| B       | 1          | 25                                  | 25 (100)                      | 24 (96.0)                           | 24 (1)                                         | 2 (8.3)              |
|         | 2          | 30                                  | 30 (100)                      | 30 (100)                            | 30 (1)                                         | 4 (13.3)             |
|         | 3          | 31                                  | 30 (96.8)                     | 27 (90.0)                           | 27 (1)                                         | 5 (18.5)             |
| C       | 1          | 36                                  | 33 (91.7)                     | 31 (93.9)                           | 31 (1)                                         | 6 (19.4)             |
|         | 2          | 34                                  | 32 (94.1)                     | 31 (96.9)                           | 31 (1)                                         | 7 (22.6)             |
|         | 3          | 37                                  | 36 (97.3)                     | 35 (97.2)                           | 35 (1)                                         | 8 (22.9)             |

3  
 4  
 5  
 6

7 Table S2. Effect of vacuum condition on FD spermatozoa for *in vitro* development following  
 8 ICSI

| Storage periods | Vacuum condition | No. of oocytes surviving after ICSI | No. (%) of fertilised embryos | No. (%) of blastocysts at 96 h |
|-----------------|------------------|-------------------------------------|-------------------------------|--------------------------------|
| 1 day           | Vacuumed         | 111                                 | 109 (98.2)                    | 57 (52.3)                      |
|                 | Non-vacuumed     | 118                                 | 110 (93.2)                    | 54 (49.1)                      |
| 1 week          | Vacuumed         | 168                                 | 164 (97.6)                    | 61 (37.2)a                     |
|                 | Non-vacuumed     | 158                                 | 129 (81.6)                    | 13 (10.1)b                     |
| 2 weeks         | Vacuumed         | 137                                 | 134 (97.8)                    | 85 (63.4)a                     |
|                 | Non-vacuumed     | 129                                 | 105 (81.4)                    | 1 (1.0)b                       |
| 3 weeks         | Vacuumed         | 151                                 | 149 (98.2)                    | 96 (64.4)a                     |
|                 | Non-vacuumed     | 144                                 | 84 (58.3)                     | 0 (0)b                         |

9 Different letters indicate statistically significant differences at  $P < 0.05$ .

10  
 11  
 12

13 Table S3. Comet assay of FD sperm obtained from vacuumed and nonvacuumed ampoules

| Storage periods | Tesla result | No. of examined spermatozoa | Average length of comet tail | SD   | <i>P</i> value, Kruskal–Wallis test |
|-----------------|--------------|-----------------------------|------------------------------|------|-------------------------------------|
| 1 day           | Vacuumed     | 845                         | 1                            | 0.37 | < 0.05                              |
|                 | Non-vacuumed | 845                         | 1.07                         | 0.42 |                                     |
| 1 week          | Vacuumed     | 1568                        | 1                            | 0.54 | < 0.05                              |
|                 | Non-vacuumed | 1397                        | 1.05                         | 0.61 |                                     |
| 2 weeks         | Vacuumed     | 1100                        | 1                            | 0.23 | < 0.05                              |
|                 | Non-vacuumed | 943                         | 1.10                         | 0.3  |                                     |
| 3 weeks         | Vacuumed     | 998                         | 1                            | 0.34 | < 0.05                              |
|                 | Non-vacuumed | 839                         | 1.04                         | 0.35 |                                     |

14

15

16

17

18 Table S4. Comet assay of FD sperm obtained from Tesla-positive and Tesla-negative ampoules and Tesla-treated and -untreated ampoules

| Storage period | Tesla result | No. of examined spermatozoa | Average length of comet tail | SD   | <i>P</i> value, Kruskal–Wallis test |
|----------------|--------------|-----------------------------|------------------------------|------|-------------------------------------|
| 1 day          | Positive     | 618                         | 1.00                         | 0.43 | < 0.05                              |
|                | Negative     | 569                         | 1.2                          | 0.48 |                                     |
|                | Treated      | 631                         | 1.01                         | 0.48 | > 0.05                              |
|                | Non-treated  | 772                         | 1.00                         | 0.38 |                                     |

20

21

22

23

24 Table S5. Brightness of male pronuclei derived from Tesla-treated or -untreated spermatozoa and immunostained with the anti-gamma-H2AX antibody

| Storage periods | Tesla treatment | No. of zygotes | Average brightness of male pronucleus | SD   | <i>P</i> value, Kruskal–Wallis test |
|-----------------|-----------------|----------------|---------------------------------------|------|-------------------------------------|
| 1 day           | +               | 25             | 1.35                                  | 0.17 | > 0.05                              |
|                 | -               | 33             | 1.47                                  | 0.27 |                                     |
| 7 days          | +               | 33             | 1.48                                  | 0.18 | > 0.05                              |
|                 | -               | 36             | 1.53                                  | 0.22 |                                     |

26

27

28



29 Table S6. Full-term development of embryos obtained from Tesla-treated FD spermatozoa

| Storage periods | Tesla result | No. of oocytes surviving after ICSI | No. (%) of fertilised embryos | No. (%) of two-cell embryos at 24 h | No. of transferred embryos (no. of recipients) | No. (%) of offspring | Mean body weight (g) |
|-----------------|--------------|-------------------------------------|-------------------------------|-------------------------------------|------------------------------------------------|----------------------|----------------------|
| 1 day           | Posi.*       | 275                                 | 270 (98.2)                    | 214 (79.2)                          | 214 (9)                                        | 52 (24.3)            | 1.77±0.18            |
|                 | Nega.        | 269                                 | 250 (92.9)                    | 201 (80.4)                          | 201 (8)                                        | 40 (19.9)            | 1.81±0.16            |
| 1 month         | Posi.        | 170                                 | 165 (97.1)                    | 142 (86.1)                          | 142 (6)                                        | 18 (12.7)            | 1.84±0.29            |
|                 | Nega.**      | -                                   | -                             | -                                   | -                                              | -                    | -                    |
| 3 months        | Posi.        | 149                                 | 137 (91.9)                    | 111 (81.0)                          | 111 (6)                                        | 25 (22.5)            | 1.72±0.14            |
|                 | Nega.**      | -                                   | -                             | -                                   | -                                              | -                    | -                    |

30 \*: This data and Table 1 (1 day) is same.

31 \*\*: Any single spermatozoa could be collect from those ampoules.

32

33

34

35 Table S7. Effect of silica gel and deoxidiser on FD spermatozoa and the resulting embryos  
36 obtained via ICSI

| Storage periods | Name of agents             | No. of oocytes surviving after ICSI | No. (%) of fertilised embryos | No. (%) of blastocysts at 96 h |
|-----------------|----------------------------|-------------------------------------|-------------------------------|--------------------------------|
| 3 weeks         | Without                    | 117                                 | 112 (95.7)                    | 59 (52.7)a                     |
|                 | Silica gel                 | 112                                 | 110 (98.2)                    | 71 (64.5)a                     |
|                 | Deoxygenate                | 108                                 | 102 (94.4)                    | 25 (24.5)b                     |
|                 | Deoxygenate and silica gel | 120                                 | 104 (86.7)                    | 35 (33.7)b                     |

37 Different letters indicate statistically significant differences at  $P < 0.05$ .

38

39

40

41 Table S8. Effect of long-term storage of FD spermatozoa in the presence of silica gel on the  
42 development of embryos

| Storage periods | Silica gel | No. of oocytes surviving after ICSI | No. (%) of fertilised embryos | No. (%) of blastocysts at 96 h |
|-----------------|------------|-------------------------------------|-------------------------------|--------------------------------|
| 1 month         | -          | 93                                  | 67 (72.0)                     | 22 (32.8)                      |
|                 | +          | 101                                 | 99 (98.0)                     | 35 (35.4)                      |
| 3 months        | -          | 116                                 | 93 (80.2)                     | 27 (29.0)                      |
|                 | +          | 205                                 | 203 (99.0)                    | 88 (43.3)                      |

43

44 Table S9. Full-term development of embryos derived from FD spermatozoa stored in  
 45 ampoules containing silica gel

| Storage periods | Silica gel | No. of oocytes surviving after ICSI | No. (%) of fertilised embryos | No. (%) of two-cell embryos at 24 h | No. of transferred embryos (no. of recipients) | No. (%) of offspring | Mean body weight (g) |
|-----------------|------------|-------------------------------------|-------------------------------|-------------------------------------|------------------------------------------------|----------------------|----------------------|
| 1 month         | –          | 57                                  | 57 (100)                      | 54 (94.7)                           | 54 (2)                                         | 9 (16.6)a            | 1.66±0.20            |
|                 | +          | 141                                 | 136 (96.5)                    | 116 (96.5)                          | 116 (6)                                        | 47 (40.5)b           | 1.91±0.26            |
| 3 months        | –          | 172                                 | 154 (89.5)                    | 142 (92.2)                          | 142 (5)                                        | 26 (18.3)            | 1.63±0.17            |
|                 | +          | 144                                 | 142 (98.6)                    | 131 (92.3)                          | 131 (6)                                        | 24 (18.3)            | 1.68±0.15            |

46  
 47  
 48  
 49

50 Table S10. Analysis of FD sperm stored at RT for 1 week or 1 year using comet assay

| Storage periods | No. of spermatozoa | Average length of comet tail | SD   | <i>P</i> value, Kruskal–Wallis test |
|-----------------|--------------------|------------------------------|------|-------------------------------------|
| Within 1 week   | 1300               | 1                            | 0.44 |                                     |
| 1 year          | 943                | 1.15                         | 0.45 | < 0.05                              |

51  
 52  
 53  
 54

55 Table S11. Brightness of male pronuclei derived from FD spermatozoa stored at RT for 1  
 56 day, 1 week or 1 year and immunostained with anti-gamma-H2AX antibody

| Storage periods | No. of zygotes | Average brightness of male pronucleus | SD   | <i>P</i> value, Kruskal–Wallis test |
|-----------------|----------------|---------------------------------------|------|-------------------------------------|
| 1 day           | 25             | 1.35                                  | 0.17 |                                     |
| 1 week          | 33             | 1.48                                  | 0.18 | < 0.05                              |
| 1 year          | 70             | 1.49                                  | 0.26 | < 0.05                              |

57  
 58  
 59

60 Table S12. Full-term development of embryos derived from FD sperm preserved for 1 year  
 61 at RT

| Storage periods | Male ID            | No. of oocytes surviving after ICSI | No. (%) of fertilised embryos | No. (%) of two-cell embryos at 24 h | No. of transferred embryos (no. of recipients) | No. (%) of offspring | Mean body weight (g) |
|-----------------|--------------------|-------------------------------------|-------------------------------|-------------------------------------|------------------------------------------------|----------------------|----------------------|
| 3 months        | 2                  | 51                                  | 41                            | 33 (80.5)                           | 33 (2)                                         | 5 (15.2)             | 1.78±0.16            |
|                 | 3                  | 33                                  | 33                            | 31 (93.9)                           | 31 (2)                                         | 9 (29.0)             | 2.32±0.12            |
|                 | 12                 | 30                                  | 28                            | 27 (96.4)                           | 27 (1)                                         | 6 (22.2)             | 1.97±0.09            |
|                 | 13                 | 19                                  | 19                            | 18 (94.7)                           | 18 (1)                                         | 5 (27.8)             | 2.23±0.07            |
|                 | 14                 | 33                                  | 31                            | 31 (100)                            | 31 (1)                                         | 3 (9.7)              | 1.49±0.08            |
|                 | 15                 | 19                                  | 18                            | 16 (88.9)                           | 16 (1)                                         | 5 (31.3)             | 1.88±0.12            |
|                 | 16                 | 36                                  | 33                            | 29 (87.9)                           | 29 (1)                                         | 5 (17.2)             | 1.92±0.12            |
|                 | 17                 | 70                                  | 70                            | 66 (94.3)                           | 66 (2)                                         | 8 (12.1)             | 1.61±0.29            |
|                 | 18                 | 53                                  | 50                            | 47 (94.0)                           | 47 (2)                                         | 11 (23.4)            | 1.54±0.17            |
| 6 months        | 1                  | 64                                  | 62                            | 51 (82.3)                           | 51 (2)                                         | 4 (7.8)              | 2.08±0.22            |
|                 | 10*                | 19                                  | 19                            | 17 (89.5)                           | 17 (1)                                         | 4 (23.5)             | 2.22±0.11            |
|                 | 11                 | 22                                  | 19                            | 17 (89.5)                           | 17 (1)                                         | 3 (17.6)             | 1.52±0.17            |
| 1 year          | 1                  | 103                                 | 81                            | 59 (72.8)                           | 59 (2)                                         | 2 (3.4)              | 2.04±0.22            |
|                 | 2                  | 249                                 | 183                           | 175 (95.6)                          | 175 (4)                                        | 25 (14.3)            | 1.93±0.13            |
|                 | 3                  | 70                                  | 66                            | 48 (72.7)                           | 48 (2)                                         | 17 (35.4)            | 1.75±0.17            |
|                 | 4                  | 323                                 | 252                           | 212 (84.1)                          | 212 (8)                                        | 35 (16.5)            | 1.99±0.20            |
|                 | 5                  | 147                                 | 93                            | 63 (67.7)                           | 63 (2)                                         | 9 (14.3)             | 1.94±0.22            |
|                 | 6                  | 99                                  | 75                            | 37 (49.3)                           | 37 (2)                                         | 0 (0)                | -                    |
|                 | 8*                 | 49                                  | 46                            | 32 (69.6)                           | 32 (2)                                         | 10 (31.2)            | 1.71±0.08            |
|                 | 9*                 | 47                                  | 45                            | 27 (60.0)                           | 27 (1)                                         | 2 (7.4)              | 1.59±0.07            |
|                 | 10*                | 37                                  | 34                            | 23 (67.6)                           | 23 (1)                                         | 9 (39.1)             | 1.86±0.18            |
|                 | 1 year<br>4 months | 7                                   | 128                           | 106                                 | 82 (77.4)                                      | 82 (3)               | 18 (22.0)            |

\*BDF1 oocytes were used for ICSI.

62  
 63  
 64  
 65

66 Table S13. Fertility of offspring derived FD spermatozoa stored for 1 year at RT.

| Offspring pair ID* | Birth date of offspring | Delivery date of next generation | Period from birth day of parents and their first delivery day (day) | No. of offspring |
|--------------------|-------------------------|----------------------------------|---------------------------------------------------------------------|------------------|
| 1                  | 2017/8/26               | 2017/10/25                       | 60                                                                  | 15               |
|                    |                         | 2017/12/1                        | 97                                                                  | 5                |
| 2                  | 2017/8/28               | 2017/11/1                        | 64                                                                  | 4                |
|                    |                         | 2017/11/10                       | 73                                                                  | 15               |
| 3                  | 2017/9/9                | 2017/11/16                       | 68                                                                  | 14               |
|                    |                         | 2017/11/20                       | 72                                                                  | 13               |
| 4                  | 2017/9/10               | 2017/11/10                       | 61                                                                  | 13               |
|                    |                         | 2017/11/13                       | 64                                                                  | 15               |

67 \*One male and two female offspring were randomly selected from each experiment and  
 68 mated with each other.

69
